# Supplementary material for: Mithramycin A Inhibits Colorectal Cancer Growth by Targeting Cancer Stem Cells
Source: PubMed Central journal article supplement (PMC6811578; doi:10.1038/s41598-019-50917-3), 2019-10-23

## Supplementary Information

### **Mithramycin A Inhibits Colorectal Cancer Growth by Targeting Cancer Stem Cells**

Waise Quarni, Rinku Dutta, Ryan Green, Sandhyabanu Katiri, Bhaumik Patel, Shyam S Mohapatra and Subhra Mohapatra

Table 1: Primers used for qRT-PCR in this manuscript.

| Mouse Primers | Forward               | Reverse              |
|---------------|-----------------------|----------------------|
| Beta Actin    | GGGGTGTGGAAGGTCTCAA   | AAATCTGGCACCACACCTTC |
| SOX2          | GAAGCGCCTAACGTACCACT  | TTAACGCAAAAACCGTGATG |
| CD133         | TTGTTCTGGTTCGGCATAGG  | CTGAGTCTCCACCAGGTTTC |
| LGR5          | TGCCCATCACACTGTCACTGT | CACCCTGAGCAGCATCCTG  |

| Human Primers | Forward               | Reverse               |
|---------------|-----------------------|-----------------------|
| Beta Actin    | GGGGTGTGGAAGGTCTCAA   | TTCTACAATGAGCTGCGTGTG |
| OCT4          | TCCAGGTTTTCTTTCCCTAGC | TGRACTCCTCGGTCCCTTTC  |
| SOX2          | GCAAGAAGCCTCTCCTTGAA  | GCTAGTCTCCAAGCGACGAA  |
| NANOG         | CTCGCTGATTAGGCTCCAAC  | CAGTCTGGACACTGGCTGAA  |
| CD133         | CAAATGTGGTGGAGAAATGC  | GTGATTTGCCACAAAACCAT  |
| LGR5          | TCAGTCAGCTGCTCCCGAAT  | CGTTTCCCGCAAGACGTAAC  |
| ALDH1         | CACGGGCCTCCTCCACATT   | AGGGGCAGCCATTTCTTCTCA |
| SNAIL         | AGACGAGGACAGTGGGAAAG  | AGATCCTTGGCCTCAGAGAG  |

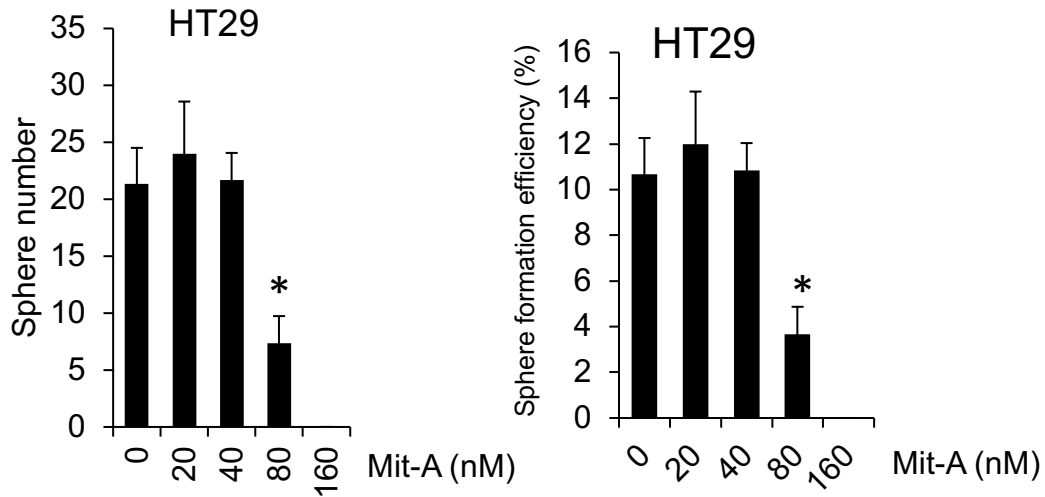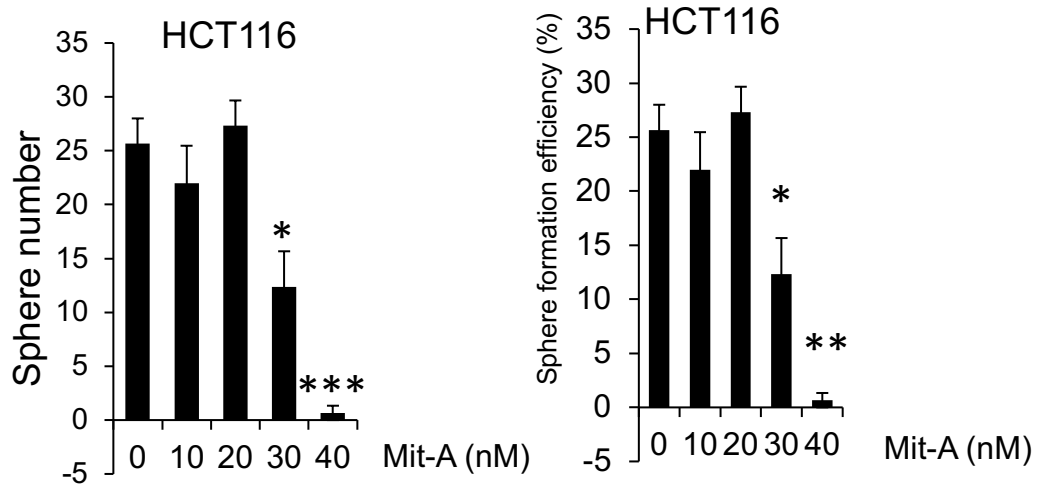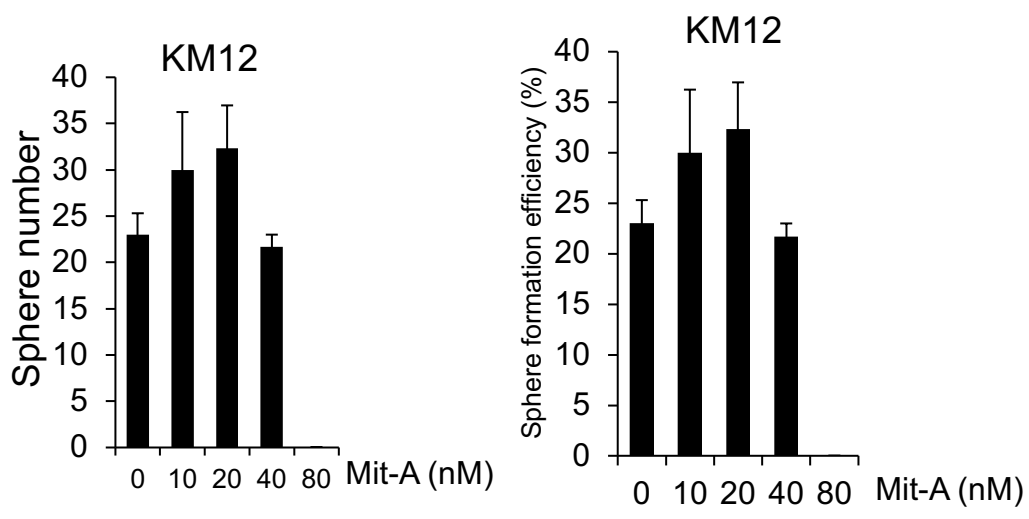

**Supplementary figure 1:** HT29, HCT116 and KM12 cells were plated in 96-well ultra-low attachment plates (200, 100 and 100 cells per well, respectively) in stem cell culture media. Cells were treated with Mithramycin A with indicated doses for 5 consecutive days and cell numbers were counted with microscope. Sphere formation efficiency was measured as the number of spheres formed per 100 cells plated in each well.

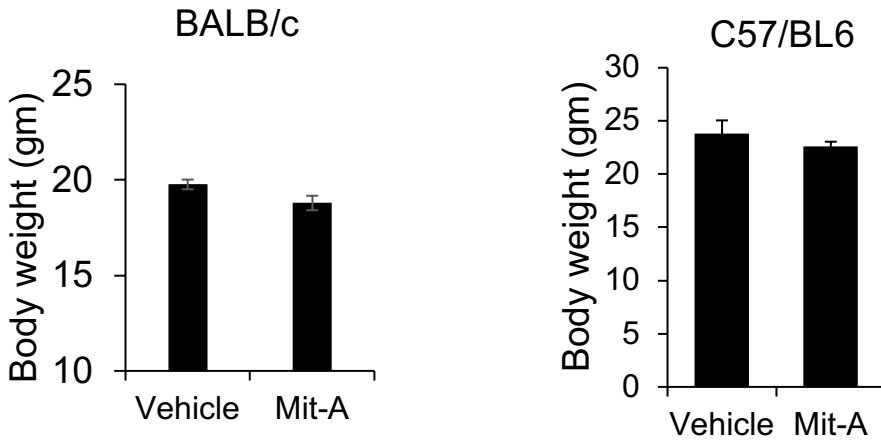

**Supplementary figure 2:** Body weight of the BALB/c and C57/BL6 mice treated with either Vehicle (DMSO) or Mithramycin A (Mit-A), as described in figure 6. Body weight was measured starting the day of tumor cell injection into the flank and measured every other day until they were sacrificed.

Fig. 1G (uncropped blots)

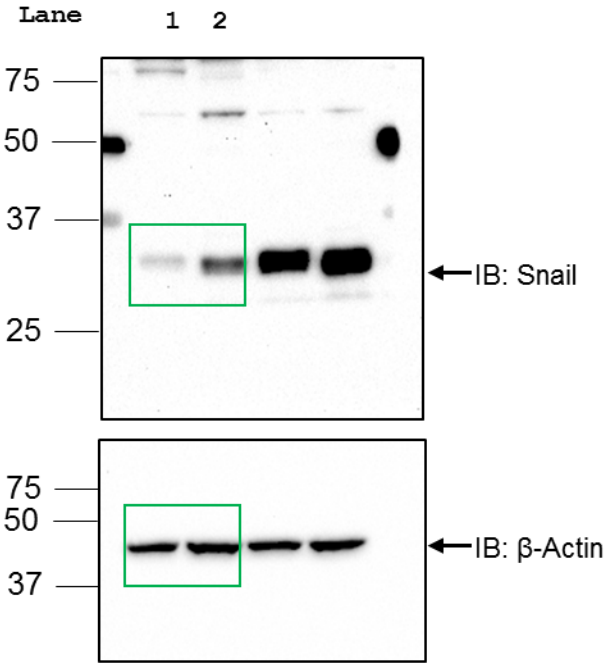

Fig. 1H (uncropped blots)

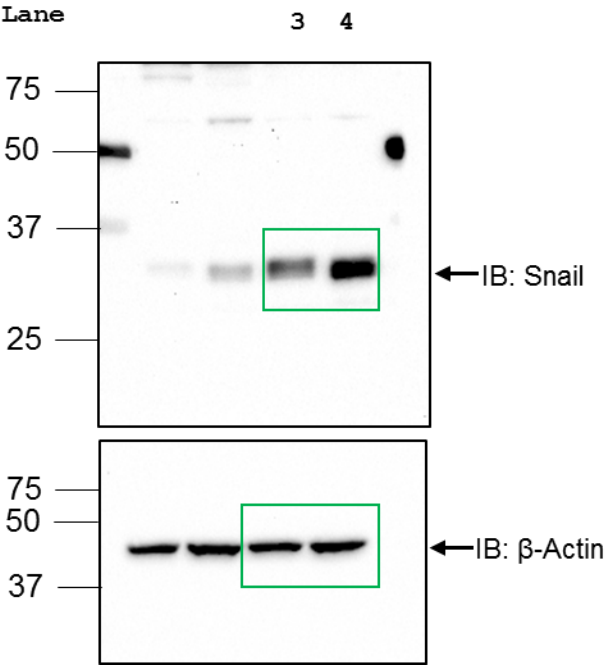

Fig. 5D (uncropped blots)

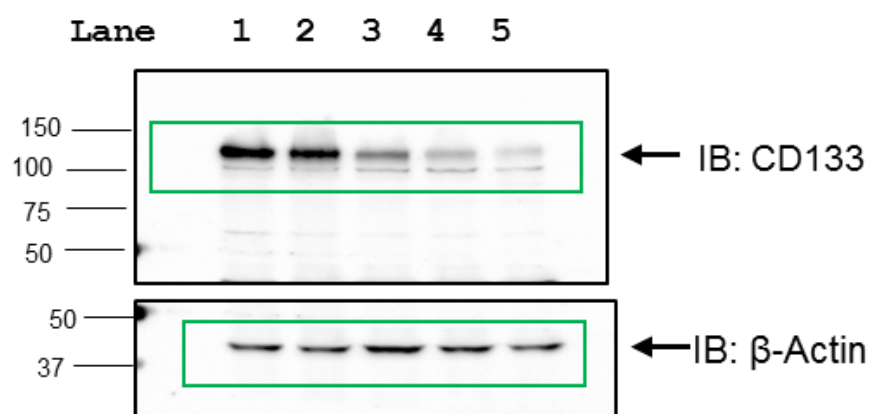

Fig. 5E (uncropped blots)

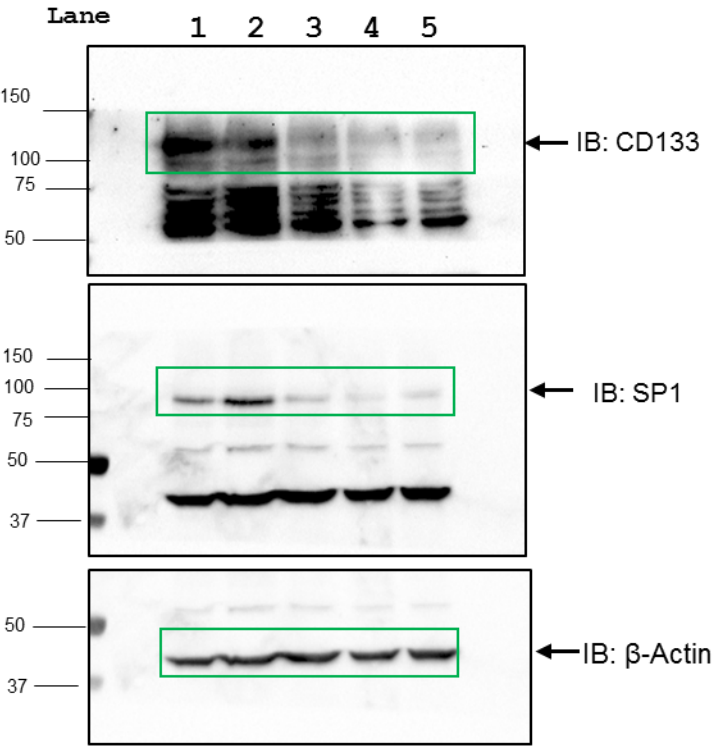

Fig. 5F (uncropped blots)

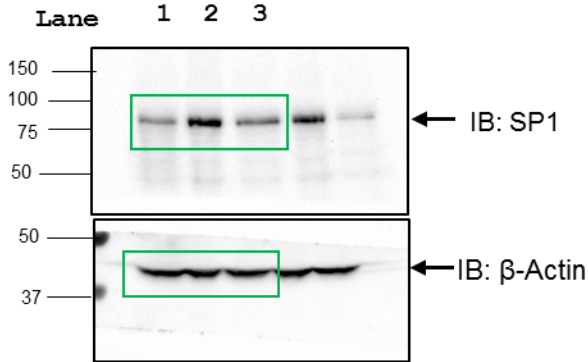

Fig. 8C (Uncropped Blot)

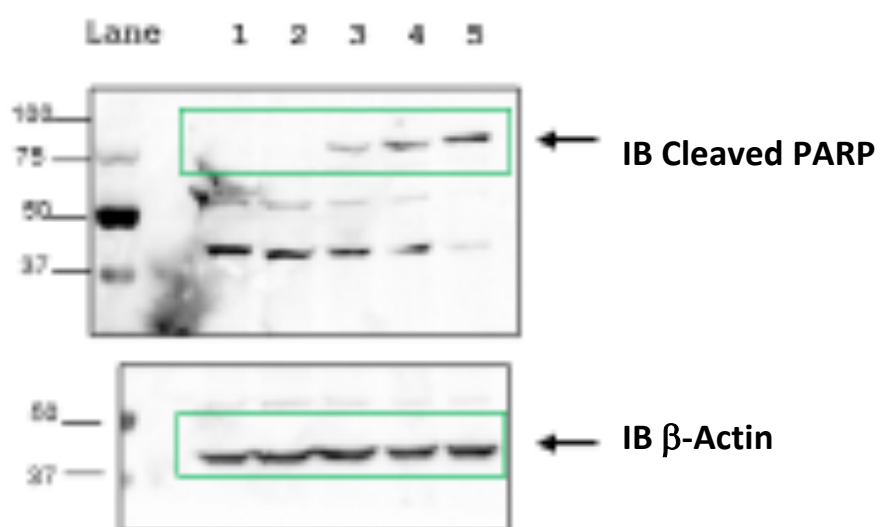



Fig. 8D (uncropped blots)

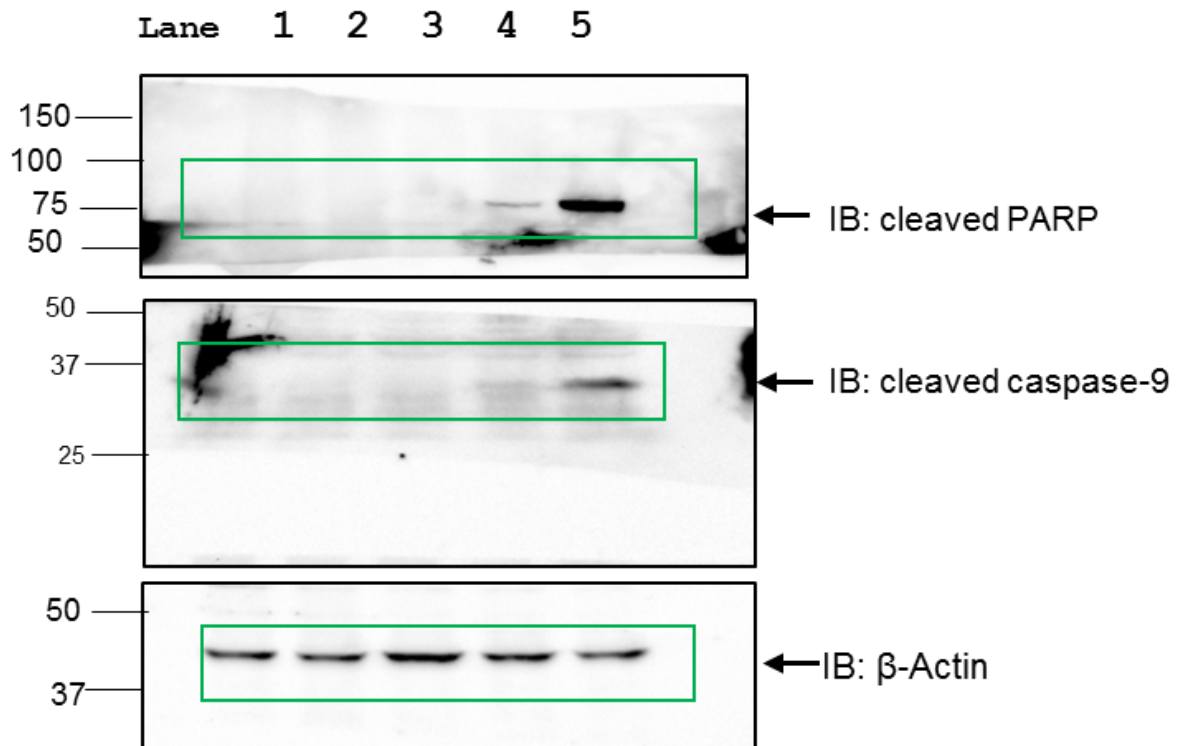

Figure 8 E (uncropped blot)

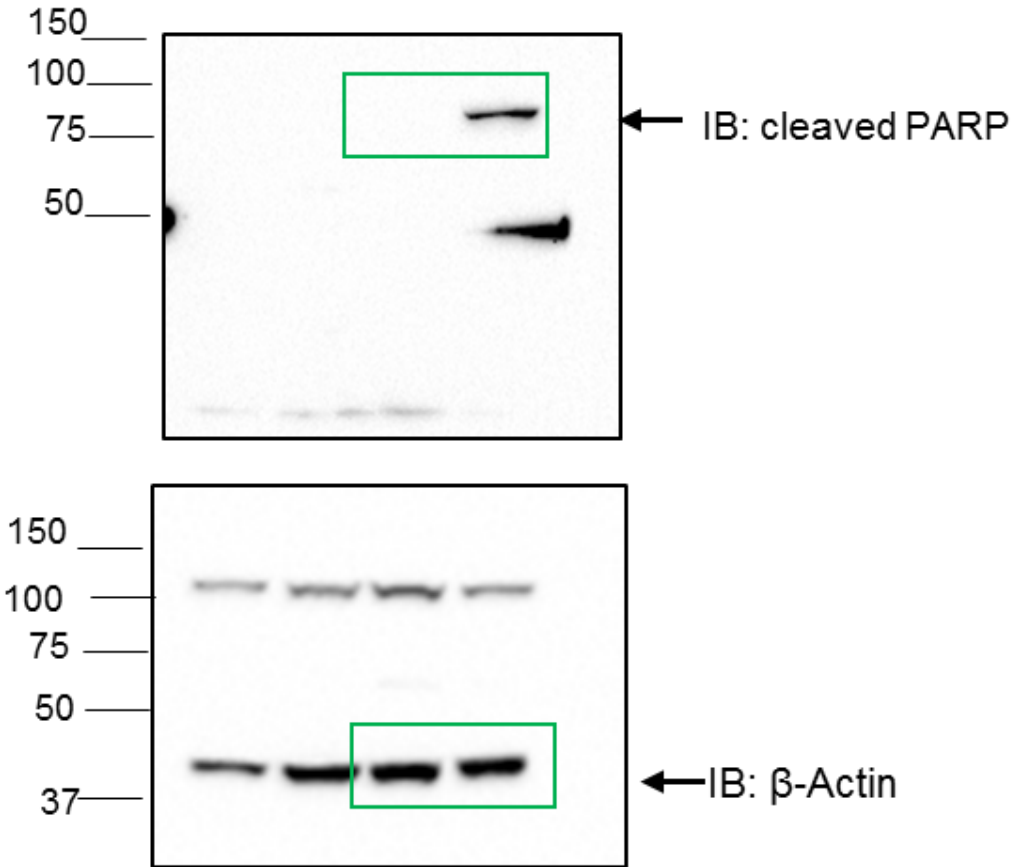

Supplement: 41598_2019_50917_MOESM1_ESM.pdf [file 41598_2019_50917_MOESM1_ESM.pdf]
